# Supplementary material
Source: publisher figshare collection journal article supplement (https://tandf.figshare.com/ndownloader/files/12461816)
Supplement: Supplementary file 1 [file 12461816]

**Fig. S1. SDS-PAGE of cell free extract prepared from *Escherichia coli* BL21(DE3) and C41(DE3) expressing *UGT85A47*.**

Same amount of cell free extracts prepared from *E. coli* expressing *UGT85A47* were separated by SDS-PAGE. Left panel; cell free extract from *E. coli* BL21(DE3) expressing *UGT85A47*, right panel; cell free extract from *E. coli* C41(DE3) expressing *UGT85A47*. Arrows indicate UGT85A47.
